# Supplementary material for: The serum 25-hydroxyvitamin D levels and hip fracture risk: a meta-analysis of prospective cohort studies
Source: PubMed Central journal article supplement (PMC5503658; doi:10.18632/oncotarget.16337), 2017-03-17
Supplement: oncotarget-08-39849-s001.pdf [file oncotarget-08-39849-s001.pdf]

## The serum 25-hydroxyvitamin D levels and hip fracture risk: a meta-analysis of prospective cohort studies

### Supplementary Material

Supplementary Figure S1: The covariate meta-regression of year, age, follow-up term, study-type, gender and location showed no heterogeneity was found (all of the  $P > 0.10$ , see the red dash box)

| lnrr          | Coef.     | Std. Err. | t     | P> t  | [95% Conf. Interval] |          |
|---------------|-----------|-----------|-------|-------|----------------------|----------|
| year          | .0380316  | .1226795  | 0.31  | 0.769 | -.2773261            | .3533893 |
| age           | -.0825492 | .656901   | -0.13 | 0.905 | -1.771167            | 1.606069 |
| followup      | -.3588411 | .6932849  | -0.52 | 0.627 | -2.140987            | 1.423304 |
| cohort        | .1998024  | .6754488  | 0.30  | 0.779 | -1.536494            | 1.936099 |
| femaleandmale | -.3920224 | 1.001775  | -0.39 | 0.712 | -2.967168            | 2.183123 |
| male          | -.1429906 | 1.404085  | -0.10 | 0.923 | -3.752305            | 3.466324 |
| newzealand    | -.4817315 | 3.608009  | -0.13 | 0.899 | -9.756413            | 8.79295  |
| european      | .5687632  | 3.073057  | 0.19  | 0.860 | -7.330782            | 8.468309 |
| usa           | .5047373  | 3.070233  | 0.16  | 0.876 | -7.387549            | 8.397023 |
| _cons         | -75.63766 | 245.3524  | -0.31 | 0.770 | -706.336             | 555.0607 |
